# Supplementary material
Source: PubMed Central journal article supplement (PMC522592)
Supplement: eukcell_3_5_1154__1.pdf [file eukcell_3_5_1154__1.pdf]

**Table A1: Plasmids**

| Plasmid                | Relevant genotype                                                                                                                                                                                        | Reference  |
|------------------------|----------------------------------------------------------------------------------------------------------------------------------------------------------------------------------------------------------|------------|
| <b>Cloning Vectors</b> |                                                                                                                                                                                                          |            |
| pRS313                 | Cloning replicative vector,<br><i>CEN HIS3</i> Ap <sup>R</sup>                                                                                                                                           | (8)        |
| pRS425                 | Cloning replicative vector,<br>2 $\mu$ <i>LEU2</i> Ap <sup>R</sup>                                                                                                                                       | (3)        |
| pTC3                   | Cloning, expression vector<br><i>CEN TRP1</i> , Ap <sup>R</sup>                                                                                                                                          | (1)        |
| YGALSET351             | Cloning, expression vector<br><i>CEN LEU2</i> Ap <sup>R</sup>                                                                                                                                            | (4)        |
| YGALSET983             | Cloning, expression vector<br>2 $\mu$ <i>LEU2</i> Ap <sup>R</sup>                                                                                                                                        | (4)        |
| YGALSET986             | Cloning, expression vector<br><i>CEN HIS3</i> Ap <sup>R</sup>                                                                                                                                            | (4)        |
| pUC19                  | Cloning vector Ap <sup>R</sup>                                                                                                                                                                           | (12)       |
| pBSIIKS+/-             | Cloning vector Ap <sup>R</sup>                                                                                                                                                                           | Stratagene |
| pGAD-C1-3              | Expression vector, 2 $\mu$<br><i>LEU2</i> Ap <sup>R</sup>                                                                                                                                                | (5)        |
| pGBD-C1-3              | Expression vector, 2 $\mu$ <i>TRP1</i><br>Ap <sup>R</sup>                                                                                                                                                | (5)        |
| pCgGAD-C1-2            | A 1.5kb <i>SphI</i> -fragment containing the GAL4AD/Polylinker/Terminator cassette of pGAD-C1-3 was cloned into <i>EcoRI/SalI</i> digested, blunt ended and religated pCgACT14 digested with <i>SphI</i> | This work  |
| pCgACT14               | Cloning, replicative vector,<br><i>CgCEN CgTRP1</i>                                                                                                                                                      | (7)        |
| pCgACH3                | Cloning, replicative vector,<br><i>CgCEN CgHIS3</i>                                                                                                                                                      | (7)        |
| p112-8XM               | Cloning, replicative vector,<br><i>CgCEN ScURA3</i>                                                                                                                                                      | (7)        |
| pGEX-2T                | Cloning, expression vector,<br>Ap <sup>R</sup>                                                                                                                                                           | Novagen    |
| pGEX-4T-2              | Cloning, expression vector,<br>Ap <sup>R</sup>                                                                                                                                                           | Novagen    |
| pADNS                  | Cloning replicative vector,                                                                                                                                                                              | (2)        |

|                                              |                                                                                                                       |           |
|----------------------------------------------|-----------------------------------------------------------------------------------------------------------------------|-----------|
|                                              | 2 $\mu$ <i>LEU2</i> Ap <sup>R</sup>                                                                                   |           |
| pET16b                                       | Cloning, expression vector, Ap <sup>R</sup>                                                                           | Novagen   |
| pET28a+                                      | Cloning, expression vector, Km <sup>R</sup>                                                                           | Novagen   |
| <b>Plasmid clones from genomic library</b>   |                                                                                                                       |           |
| YepTS4                                       | Yep24 containing a ~11kb <i>Sau3a</i> digested genomic DNA fragment in <i>Bam</i> H1 site carrying <i>CgCEN</i> .     | This work |
| YepTS20.1                                    | Yep24 containing a ~14.6kb <i>Sau3a</i> digested genomic DNA fragment in <i>Bam</i> H1 site carrying <i>CgNDC10</i> . | This work |
| YepTS15.1                                    | Yep24 containing a ~13.7kb <i>Sau3a</i> digested genomic DNA fragment in <i>Bam</i> H1 site carrying <i>CgCEP3</i> .  | This work |
| YepTS5.4                                     | Yep24 containing a ~14kb <i>Sau3a</i> digested genomic DNA fragment in <i>Bam</i> H1 site carrying <i>CgCTF13</i> .   | This work |
| YepTS3.3                                     | Yep24 containing a ~9kb <i>Sau3a</i> digested genomic DNA fragment in <i>Bam</i> H1 site carrying <i>CgCTF13</i> .    | This work |
| YepTS34.2                                    | Yep24 containing a ~10.9kb <i>Sau3a</i> digested genomic DNA fragment in <i>Bam</i> H1 site carrying <i>CgMIF2</i> .  | This work |
| YepTS27.2                                    | Yep24 containing a ~14kb <i>Sau3a</i> digested genomic DNA fragment in <i>Bam</i> H1 site carrying <i>CgCSE4</i> .    | This work |
| YepTS9.1                                     | Yep24 containing a ~13kb <i>Sau3a</i> digested genomic DNA fragment in <i>Bam</i> H1 site carrying <i>CgCBFI</i> .    | (11)      |
| <b>Plasmid subclones used for sequencing</b> |                                                                                                                       |           |
| pTS22                                        | A 4kb <i>Sph</i> I-fragment containing <i>CgNDC10</i> (from YepTS#20.1) was cloned into pUC19.                        | This work |

|                                    |                                                                                                                                                                                                                                                                                                           |           |
|------------------------------------|-----------------------------------------------------------------------------------------------------------------------------------------------------------------------------------------------------------------------------------------------------------------------------------------------------------|-----------|
| pTS26                              | A 3.8kb <i>Pst</i> I- <i>Sph</i> I fragment containing Cg <i>MIF2</i> (from YepTS#34.2) was cloned into pUC19.                                                                                                                                                                                            | This work |
| pTS38                              | A 3.2kb <i>Eco</i> RI/ <i>Sph</i> I fragment containing Cg <i>CEP3</i> (from YepTS#15.1) was cloned into pUC19.                                                                                                                                                                                           | This work |
| pTS29                              | A 3kb <i>Bam</i> HI/ <i>Eco</i> RI fragment containing Cg <i>CSE4</i> (from YepTS#27.2) was cloned into pUC19.                                                                                                                                                                                            | This work |
| pTS30                              | A 4kb <i>Sma</i> I-fragment containing Cg <i>CTF13</i> (from YepTS#5.4) was cloned into pUC19.                                                                                                                                                                                                            | This work |
| <b>Plasmids for CBF3-deletions</b> |                                                                                                                                                                                                                                                                                                           |           |
| pTS53<br>(Cg <i>ndc10</i> Δ)       | A 479 bp <i>Kpn</i> I/ <i>Xho</i> I PCR fragment (Primers CgA1/1 and CgA1/2), a 467bp <i>Xho</i> I/ <i>Xba</i> I PCR fragment (Primers CgA2/1 and CgA2/2) and a 1kb <i>Xho</i> I fragment containing Cg <i>TRP1</i> (from pCgACT14) were cloned into pUC19 digested with <i>Kpn</i> I/ <i>Xba</i> I. ApR. | This work |
| pTS54<br>(Cg <i>ctf13</i> Δ)       | A 389 bp <i>Kpn</i> I/ <i>Xho</i> I PCR fragment (Primers CgC1/1 and CgC1/2), a 437bp <i>Xho</i> I/ <i>Xba</i> I PCR fragment (Primers CgC2/1 and CgC2/2) and a 1kb <i>Xho</i> I fragment containing Cg <i>TRP1</i> (from pCgACT14) were cloned into pUC19 digested with <i>Kpn</i> I/ <i>Xba</i> I. ApR. | This work |
| pTS55<br>(Cg <i>cep3</i> Δ)        | A 458 bp <i>Kpn</i> I/ <i>Xho</i> I PCR fragment (Primers CgB1/1 and CgB1/2), a 429bp                                                                                                                                                                                                                     | This work |

|                                         |                                                                                                                                                                                                 |           |
|-----------------------------------------|-------------------------------------------------------------------------------------------------------------------------------------------------------------------------------------------------|-----------|
|                                         | <i>XhoI/XbaI</i> PCR fragment (Primers CgB2/1 and CgB2/2) and a 1kb <i>XhoI</i> fragment containing Cg <i>TRP1</i> (from pCgACT14) were cloned into pUC19 digested with <i>KpnI/XbaI</i> . ApR. |           |
| <b>Vectors with Open Reading frames</b> |                                                                                                                                                                                                 |           |
| pJL33                                   | A 1.8kb <i>NdeI/BamHI</i> fragment containing the Sc <i>CEP3</i> ORF was cloned into pET16B.                                                                                                    | (9)       |
| pJL36                                   | A 1.4kb <i>NdeI/BamHI</i> fragment containing the Cg <i>CTF13</i> ORF was cloned into pET16B.                                                                                                   | (9)       |
| pTS41                                   | A 540bp <i>BamHI/EcoRI</i> PCR fragment of Cg <i>SKP1</i> (primer GST-3D1 and GST-3D2) was cloned into pGEX-2T.                                                                                 | This work |
| pTS43                                   | A 1622 bp <i>BamHI/EcoRI</i> PCR fragment encoding for Cg <i>MIF2</i> (primer GST-MIF2.1 and GST-MIF2.2) was cloned into pGEX-2T.                                                               | This work |
| pTS45                                   | A 2.7 kb <i>SmaI/XhoI</i> PCR fragment encoding for the ORF of Cg <i>NDC10</i> (primer GST-p110-1 and GST-p110-2) was cloned into pGEX-4T-2.                                                    | This work |
| pTS52                                   | A 1.8kb <i>SmaI/XhoI</i> PCR fragment encoding for the ORF of Cg <i>CEP3</i> (primer GST-3B-1.2 and GST-3B-2.1) was cloned into pGEX-4T-2 digested with <i>SmaI-XhoI</i> .                      | This work |
| pTS56                                   | A 1.4 kb <i>BamHI/EcoRI</i> PCR fragment encoding Cg <i>CTF13</i> was cloned into pGEX2-T digested with                                                                                         | This work |

|                       |                                                                                                                                                        |           |
|-----------------------|--------------------------------------------------------------------------------------------------------------------------------------------------------|-----------|
|                       | <i>Bam</i> HI/ <i>Eco</i> RI.                                                                                                                          |           |
| pTS57                 | A 1.8kb <i>Bam</i> HI/ <i>Xho</i> I fragment of Cg <i>CEP3</i> (from pTS52) was cloned into pRSETA.                                                    | This work |
| pTS60                 | A 1 kb <i>Bam</i> HI/ <i>Cla</i> I-fragment from pTS45 was replaced with WT sequence from pTS22.1 to remove a point mutation in the gene.              | This work |
| pTS62                 | A 2.7kb <i>Sma</i> I/ <i>Xho</i> I fragment containing the Cg <i>NDC10</i> ORF was cloned into pUC19 digested with <i>Sma</i> I/ <i>Sal</i> I.         | This work |
| pTS66                 | A 1.4kb <i>Bam</i> HI/ <i>Eco</i> RI fragment containing the Cg <i>CTF13</i> ORF was cloned into pET28a+.                                              | This work |
| pTS74                 | A 1.8kb <i>Bam</i> HI/ <i>Xho</i> I fragment encoding for Cg <i>CEP3</i> (from pTS52) was cloned into pUC19 digested with <i>Bam</i> HI/ <i>Sal</i> I. | This work |
| pTS75                 | A 1.4kb <i>Bam</i> HI/ <i>Sac</i> I fragment containing the Cg <i>CTF13</i> ORF 9 (from pTS66) was cloned into pUC19.                                  | This work |
| pTS77                 | A 2.7kb <i>Sac</i> I/ <i>Pst</i> I fragment containing the Cg <i>NDC10</i> ORF (from pTS62) was cloned into pBSKS+/-.                                  | This work |
| pCgGAD-CgCBF1         | A 1.3kb <i>Bam</i> HI PCR fragment of Cg <i>CBF1</i> (from pET-Cg1/2) was cloned into pCgGAD-C2.                                                       | This work |
| pCgGAD-Cg <i>SKP1</i> | A 540bp <i>Nco</i> I/ <i>Bam</i> HI PCR fragment of Cg <i>SKP1</i> was cloned into pCgGAD-C2.                                                          | This work |
| pET-Cg1/2             | A 1.3kb <i>Bam</i> HI PCR fragment of CgCBF1 was cloned into pET28a+. A 431bp <i>Msc</i> I/ <i>Hind</i> III fragment was replaced with                 | (11)      |

|                                                                                                     |                                                                                                                                        |                                |
|-----------------------------------------------------------------------------------------------------|----------------------------------------------------------------------------------------------------------------------------------------|--------------------------------|
|                                                                                                     | a 1kb <i>MscI/HindIII</i> fragment from pRSCg1                                                                                         |                                |
| <b>Plasmids for studying the species specificity in <i>S. cerevisiae</i> and <i>C. glabrata</i></b> |                                                                                                                                        |                                |
| pWJ110B                                                                                             | A 4.2kb <i>PvuII</i> fragment was cloned into pBSKS+/- digested with <i>SmaI</i>                                                       | (6)                            |
| pJL33                                                                                               |                                                                                                                                        | J. Lechner, personal communic. |
| pJL36                                                                                               |                                                                                                                                        | J. Lechner, personal communic. |
| pMB038 (ScP-ScMIF2)                                                                                 | A 1.9kb <i>SphI</i> fragment containing the ScMIF2 gene was cloned into pTC3.                                                          | (1)                            |
| pYHYCbfl                                                                                            | PRS314 containing the ScCBF1 gene on a <i>SphI</i> fragment.                                                                           | H.Y. Yoon, personal communic.  |
| p112-Cp1                                                                                            | A 2.1 kb blunt ended <i>SpeI/PstI</i> fragment containing CgCBF1 was cloned into p112-8XM.                                             | (11)                           |
| pTS32 (CgP-CgNDC10)                                                                                 | A 4kb blunt ended <i>SphI</i> -fragment from pTS22.1 containing CgNDC10 into pRS425 digested with <i>SmaI</i> .                        | This work                      |
| pTS33 (CgP-CgCSE4)                                                                                  | A 3kb blunt ended <i>XbaI</i> -fragment containing CgCSE4 from pTS29 into pRS425 digested with <i>SmaI</i> .                           | This work                      |
| pTS34 (CgP-CgMIF2)                                                                                  | A 3.5kb blunt ended <i>SphI/PstI</i> -fragment containing the CgMIF2 gene was cloned into <i>SphI</i> digested and blunt ended pMB038. | This work                      |
| pTS36                                                                                               | A 5.5kb <i>SphI/SmaI</i> fragment containing CgCEP3 was cloned into pUC19.                                                             | This work                      |
| pTS37 (CgP-CgCTF13)                                                                                 | A 4kb <i>SmaI</i> fragment containing CgCTF13 from pTS30 was cloned into pRS313.                                                       | This work                      |

|                      |                                                                                                                                                                               |           |
|----------------------|-------------------------------------------------------------------------------------------------------------------------------------------------------------------------------|-----------|
| pTS39 (CgP-CgCEP3)   | A 3.4kb blunt ended <i>EcoRI-SphI</i> fragment containing CgCEP3 was cloned into pRS425 digested with <i>SmaI</i> .                                                           | This work |
| pRSCg3D (CgP-CgSKP1) | A 986bp <i>EcoRI/BamHI</i> PCR fragment of CgSKP1 (primer CgD3 and CgD2) was cloned into pRS425.                                                                              | (10)      |
| pRSCg1 (CgP-CgCBF1)  | A 2.2 kb <i>SpeI/HindIII</i> fragment carrying CgCBF1 was cloned into pRS425.                                                                                                 | (11)      |
| pTS46 (CgP-CgNDC10)  | A 4kb <i>SphI</i> blunt ended fragment containing CgNDC10 (from pTS22) was cloned into p112-8XM digested with <i>SmaI</i> .                                                   | This work |
| pTS48 (CgP-CgCEP3)   | A 3.4kb blunt ended <i>EcoRI/SphI</i> fragment containing CgCEP3 was cloned into p112-8XM digested with <i>SmaI</i> .                                                         | This work |
| pTS50 (CgP-CgCTF13)  | A 4kb <i>SmaI</i> fragment containing CgCTF13 from pTS30 was cloned into p112-8XM.                                                                                            | This work |
| pTS71 (ScP-ScNDC10)  | A 4kb <i>BamHI/PstI</i> fragment containing the ScNDC10 gene (from pWJ110p) was cloned into pCgACH3.                                                                          | This work |
| pTS125 (CgP-ScNDC10) | A 600bp PCR fragment (Primer CgA4 and CgA5.2) encoding for the CgNDC10-Promoter was digested with <i>SmaI/BamHI</i> and ligated into pTS123 digested with <i>SmaI/BamHI</i> . | This work |
| pTS128               | A 4000bp <i>SmaI/PstI</i> fragment from pTS125 encoding for the CgNDC10 promoter and the ScNDC10 gene was ligated into pCgACH3 digested with <i>SmaI/PstI</i> .               | This work |
| pTS72 (CgP-ScCEP3)   | A 480 bp <i>SmaI/NdeI</i> PCR fragment encoding for the                                                                                                                       | This work |

|                               |                                                                                                                                                                                                                                                                                                                                                                                            |           |
|-------------------------------|--------------------------------------------------------------------------------------------------------------------------------------------------------------------------------------------------------------------------------------------------------------------------------------------------------------------------------------------------------------------------------------------|-----------|
|                               | Cg <i>CEP3</i> promoter (primer3B1 and 3B2), a 900bp <i>Bam</i> HI/ <i>Pst</i> I PCR fragment encoding for the Cg <i>CEP3</i> terminator (primer 3B3 and 3B4), and a 1.8 kb <i>Nde</i> I/ <i>Bam</i> HI fragment containing the Sc <i>CEP3</i> ORF were cloned into pCgACH3 digested with <i>Sma</i> I/ <i>Pst</i> I.                                                                      |           |
| pTS73 (CgP-Sc <i>CTF13</i> )  | A 480bp <i>Sma</i> I/ <i>Ase</i> I PCR fragment encoding for the Cg <i>CTF13</i> promoter (primer 3C1 and 3C2), a 500bp <i>Bam</i> HI/ <i>Pst</i> I PCR fragment encoding for the Cg <i>CTF13</i> terminator (primer 3C3 and 3C4), and a 1.4 kb <i>Nde</i> I/ <i>Bam</i> HI fragment containing the Sc <i>CTF13</i> ORF were cloned into pCgACH3 digested with <i>Sma</i> I/ <i>Pst</i> I. | This work |
| pTS76 (GalP-Cg <i>CEP3</i> )  | A 1.8 kb <i>Sac</i> I/ <i>Pst</i> I-fragment containing the Cg <i>CEP3</i> ORF (from pTS74) was cloned into YGALSET983 digested with <i>Sac</i> I/ <i>Pst</i> I.                                                                                                                                                                                                                           | This work |
| pTS78 (GalP-Cg <i>NDC10</i> ) | A 2.7 kb <i>Kpn</i> I fragment carrying Cg <i>NDC10</i> (from pTS60) was cloned into YGALSET351 digested with <i>Kpn</i> I.                                                                                                                                                                                                                                                                | This work |
| pTS79 (ScP-Cg <i>CBF1</i> )   | A 1.3 kb <i>Bam</i> HI/ <i>Hind</i> III fragment containing Cg <i>CBF1</i> (from pETCg1/2) was cloned into pADNS digested with <i>Hind</i> III and blunt ended.                                                                                                                                                                                                                            | This work |
| pTS81 (CgP-Sc <i>CBF1</i> )   | A 339bp <i>Sac</i> I/ <i>Hind</i> III PCR fragment encoding for the Cg <i>CBF1</i> - Promoter and the first 8 aa of the Sc <i>CBF1</i> gene (Primer Cg1-P.1 and                                                                                                                                                                                                                            | This work |



|                                |                                                                                                                                                                                                  |           |
|--------------------------------|--------------------------------------------------------------------------------------------------------------------------------------------------------------------------------------------------|-----------|
|                                | Cg1-P.2), and a 1031bp <i>HindIII/XhoI</i> -fragment containing the Sc <i>CBF1</i> ORF and 744bp 3'-nontranslated region were cloned into pCgACH3 digested with <i>SacI</i> and <i>HindIII</i> . |           |
| pTS85                          | A 1.8 kb <i>BamHI/HindIII</i> -fragment encoding for the Cg <i>CBF1</i> -ORF (from pETCg1/2) and the 3'nontranslated region was cloned into pBSIIKS+/-.                                          | This work |
| pTS86                          | A 1.6 kb <i>BamHI/EcoRI</i> fragment encoding for the Cg <i>MIF2</i> -ORF (from pTS43) was cloned into pBSIIKS+/-.                                                                               | This work |
| pTS96 (GalP-Sc <i>CEP3</i> )   | A 1.8kb blunt ended <i>NdeI/BamHI</i> fragment containing Sc <i>CEP3</i> (from pJL33) was cloned into YGALSET983 digested with <i>PvuII</i> .                                                    | This work |
| pTS98 (GalP-Sc <i>CTF13</i> )  | A 1.4 kb blunt ended <i>NdeI/BamHI</i> fragment containing Sc <i>CTF13</i> (from pTS36) was cloned into YGALSET986 digested with <i>PvuII</i> .                                                  | This work |
| pTS100 (GalP-Sc <i>NDC10</i> ) | A 4kb <i>BamHI/PstI</i> fragment containing Sc <i>NDC10</i> (from pWJ110p) was cloned into YGALSET983.                                                                                           | This work |
| pTS109 (GalP-Cg <i>CTF13</i> ) | A 1.4kb <i>SacI</i> fragment containing Cg <i>CTF13</i> (from pTS75) was cloned into YGALSET983.                                                                                                 | This work |
| pTS120 (ScP-Sc <i>CBF1</i> )   | A 3.5kb blunt ended <i>SpeI</i> -fragment containing Sc <i>CBF1</i> was cloned into pCgACH3 digested with <i>SmaI</i> .                                                                          | This work |
| <b>Expression-vectors for</b>  |                                                                                                                                                                                                  |           |

| two-hybrid analysis           |                                                                                                                                             |           |
|-------------------------------|---------------------------------------------------------------------------------------------------------------------------------------------|-----------|
| pTS88 (GBD-Cg <i>NDC10</i> )  | A 2.7 kb <i>SmaI/XhoI</i> fragment containing Cg <i>NDC10</i> (from pTS60) was cloned into pGBD-C1 digested with <i>SmaI/SalI</i> .         | This work |
| pTS89 (GBD-Cg <i>CEP3</i> )   | A 1.8 kb <i>SmaI/XhoI</i> fragment containing the Cg <i>CEP3</i> ORF (from pTS 52) was cloned into pGBD-C1 digested with <i>SmaI/SalI</i> . | This work |
| pTS90 (GBD-Cg <i>CTF13</i> )  | A 1.4kb <i>BamHI/SalI</i> fragment containing Cg <i>CTF13</i> (from pTS66) was cloned into PGBD-C1.                                         | This work |
| pTS91 (GBD-Cg <i>CBF1</i> )   | A 1.8kb <i>BamHI/SalI</i> fragment containing Cg <i>CBF1</i> (from pTS85) was cloned into pGBD-C1.                                          | This work |
| pTS92 (GBD-Cg <i>MIF2</i> )   | A 1.6kb <i>BamHI/SalI</i> fragment containing the Cg <i>MIF2</i> ORF(from pTS 43) was cloned into pGBD-C1.                                  | This work |
| pTS93 (GBD-Cg <i>SKP1</i> )   | A 540bp <i>EcoRI/ClaI</i> fragment containing Cg <i>SKP1</i> (from pCgGAD-3D) was cloned into pGBD-C1.                                      | This work |
| pTS101 (GAD-Cg <i>CEP3</i> )  | A 1.8 kb <i>SmaI/XhoI</i> fragment containing the Cg <i>CEP3</i> ORF (from pTS 52) was cloned into pGAD-C1 digested with <i>SmaI/SalI</i> . | This work |
| pTS102 (GAD-Cg <i>CTF13</i> ) | A 1.4kb <i>BamHI/SalI</i> fragment containing Cg <i>CTF13</i> (from pTS66) was cloned into PGAD-C1.                                         | This work |
| pTS103 (GAD-Cg <i>MIF2</i> )  | A 1.6kb <i>BamHI/SalI</i> fragment containing the Cg <i>MIF2</i> ORF(from pTS 43) was cloned into pGAD-C1.                                  | This work |
| pTS104 (GAD-Cg <i>CBF1</i> )  | A 1.8kb <i>BamHI/SalI</i> fragment containing                                                                                               | This work |

|                                        |                                                                                                                                                                                                                                   |           |
|----------------------------------------|-----------------------------------------------------------------------------------------------------------------------------------------------------------------------------------------------------------------------------------|-----------|
|                                        | Cg <i>CBF1</i> (from pTS85) was cloned into pGAD-C1.                                                                                                                                                                              |           |
| pTS105 (GAD-Cg <i>SKP1</i> )           | A 540bp <i>EcoRI/ClaI</i> fragment containing Cg <i>SKP1</i> (from pCgGAD-3D) was cloned into pGAD-C1.                                                                                                                            | This work |
| pTS106 (GAD-Cg <i>NDC10</i> )          | A 2.7 kb <i>SmaI/XhoI</i> fragment containing Cg <i>NDC10</i> (from pTS60) was cloned into pGAD-C1 digested with <i>SmaI/SalI</i> .                                                                                               | This work |
| pTS110 (GAD-Cg <i>CSE4</i> )           | A 722bp <i>EcoRI/ClaI</i> PCR-fragment of Cg <i>CSE4</i> was cloned into pGAD-C1.                                                                                                                                                 | This work |
| pTS111(GBD-Cg <i>CSE4</i> )            | A 722bp <i>EcoRI/ClaI</i> PCR-fragment of Cg <i>CSE4</i> was cloned into pGBD-C1.                                                                                                                                                 | This work |
| pTS115 (GAD-Cg <i>CEP3</i> -aa 1- 470) | PTS101 was digested with <i>XbaI/PstI</i> , blunt ended and religated.                                                                                                                                                            | This work |
| pTS119 (GAD-Cg <i>CEP3</i> -aa 38-611) | A 1.7 kb <i>KpnI-XhoI</i> fragment of pTS101 containing Cg <i>CEP3</i> was cloned into pGAD-C1 digested with <i>BamHI</i> and blunt ended.                                                                                        | This work |
| pAM5 (GAD-Cg <i>CEP3</i> -aa 87-611)   | A 1600bp PCR fragment encoding for aa 77-611 of Cg <i>CEP3</i> (PrimersCg3B.1 /CgB5.2)was digested with <i>EcoRI</i> and <i>BamHI</i> and ligated into pGAD-C3. Amino acid sequence identity was confirmed by sequencing the DNA. | This work |
| pAM1 (GBD-Sc <i>CTF13</i> )            | A 1437bp <i>NdeI/BamHI</i> fragment of pJL36 encoding the Sc <i>CTF13</i> ORF was blunt ended and ligated into pGBD-C3 digested with <i>SmaI</i> .                                                                                | This work |
| pAM2 (GAD-Sc <i>CEP3</i> )             | A 1827bp <i>NdeI/BamHI</i> fragment of pJL33 encoding the Sc <i>CEP3</i> ORF was blunt                                                                                                                                            | This work |

|                                  |                                                                                                                                                                                                                                                                 |           |
|----------------------------------|-----------------------------------------------------------------------------------------------------------------------------------------------------------------------------------------------------------------------------------------------------------------|-----------|
|                                  | ended and ligated into pGAD-C3 digested with <i>SmaI</i> .                                                                                                                                                                                                      |           |
| pAM3 (GBD-ScCEP3)                | A 1827bp <i>NdeI/BamH1</i> fragment of pJL33 encoding the ScCEP3 ORF was blunt ended and ligated into pGBD-C3 digested with <i>SmaI</i> .                                                                                                                       | This work |
| pAM4 (GAD-ScCTF13)               | A 1437bp <i>NdeI/BamH1</i> fragment of pJL36 encoding the ScCTF13 ORF was blunt ended and ligated into pGAD-C3 digested with <i>SmaI</i> .                                                                                                                      | This work |
| pTS122                           | A 3393bp <i>ClaI</i> -fragment from pWJ110p was ligated into pGAD-C3 digested with <i>ClaI</i> .                                                                                                                                                                | This work |
| pTS123                           | A 3393bp <i>ClaI</i> -fragment from pWJ110p was ligated into pGBD-C3 digested with <i>ClaI</i> .                                                                                                                                                                | This work |
| <b>Vectors for ChIP analysis</b> |                                                                                                                                                                                                                                                                 |           |
| pTS124                           | A 1572bp <i>HpaI</i> (blunt ended)/ <i>HindIII</i> fragment from pTS30 encoding for part of the CgCTF13 gene, and a 5331bp <i>HindIII/EcoRI</i> (blunt ended) fragment from pTS126 encoding for the HA-tag was ligated into pCgACH3 digested with <i>SmaI</i> . | This work |
| pTS126                           | A 485bp PCR-fragment encoding for part of the CgCTF13 gene (Primers CgC6.1/CgC6.2) was ligated into pCR2.1-TOPO (Invitrogen). The resulting plasmid was digested with <i>KpnI/NdeI</i> and ligated with a 324bp PCR-fragment (Primers CgC6.3 and                | This work |

|        |                                                                                                                                                                                                                                                          |  |
|--------|----------------------------------------------------------------------------------------------------------------------------------------------------------------------------------------------------------------------------------------------------------|--|
|        | CgC6.5) released from a TOPO-vector with <i>KpnI</i> , encoding for the 3'nt region of the CgCTF13 gene, and a 1100bp PCR-fragment (Primers HA-F/CgHis3R on template pRSCg1HA, Stoyan et al., 2001 ) released from a TOPO vector with <i>KpnI/NdeI</i> . |  |
| pTS129 | A 996bp PCR-fragment (Primers CgA6.1.2/CgA6.2) was digested with <i>BglII/NdeI</i> , and a 160bp <i>NdeI/KpnI</i> fragment from pTS124 were ligated into pTS22 digested with <i>BglII/KpnI</i> .                                                         |  |
| pTS130 | A 435bp PCR-fragment (Primers CgB6.1.2/CgB6.2) was digested with <i>XbaI/NdeI</i> , and a 160bp <i>NdeI/EcoRI</i> fragment from pTS124 were ligated into pTS38 digested with <i>XbaI/EcoRI</i> .                                                         |  |
| pTS131 | A ~3500bp <i>SphI/KpnI</i> fragment from pTS129 encoding for CgNDC10-HA was blunt ended and ligated into pCgACH3 digested with <i>SmaI</i> .                                                                                                             |  |
| pTS132 | A ~2500bp <i>SphI/EcoRI</i> fragment from pTS130 encoding for CgCEP3-HA was blunt ended and ligated into pCgACH3 digested with <i>SmaI</i> .                                                                                                             |  |

1. **Brown, M., Goetsch, L., and L. Hartwell.** 1993. *MIF2* is required for mitotic spindle integrity during anaphase spindle elongation in *Saccharomyces cerevisiae*. *J. Cell Biol.* **123**:387-403.
2. **Colicelli, J., Birchmeier, C., Michaeli, T., O'Neill, K., Riggs, .M. and M. Wigler.** 1989. Isolation and characterization of a mammalian gene encoding a high-affinity camp phosphodiesterase. *Proc Natl Acad Sci USA* **86**:3599-3603.
3. **Christianson, T. W., Sikorski, R. S., Dante, M., Shero, J. H., and P. Hieter.** 1992. Multifunctional yeast high-copy-number shuttle vectors. *Gene* **110**:119-122.
4. **Enomoto, S., Chen, G. and Berman, J.** 1998. Vectors for expressing T7 epitope- and His6 affinity tagged fusion proteins in *S. cerevisiae*. *Biotechniques* **24**:782-788.
5. **James, P., Halladay, J., and E. A. Craig.** 1996. Genomic libraries and a host strain designed for highly efficient two-hybrid selection in yeast. *Genetics* **144**:1425-1436.
6. **Jiang, W., Lechner, J., and J. Carbon.** 1993. Isolation and characterization of a gene (CBF2) specifying a protein component of the budding yeast kinetochore. *J. Cell Biol.* **121**:513-519.
7. **Kitada, K., Yamaguchi, E., and M. Arisawa.** 1996. Isolation of a *Candida glabrata* centromere and its use in construction of plasmid vectors. *Gene* **175**:106-108.

8. **Sikorski, R. S. and P. Hieter.** 1989. A system of shuttle vectors and yeast host strains designed for efficient manipulation of DNA in *Saccharomyces cerevisiae*. *Genetics* **122**: 19-27.
9. **Stemann, O. and J. Lechner.** 1996. The *Saccharomyces cerevisiae* kinetochore contains a cyclin-CDK complexing homologue, as identified by in vitro reconstitution. *EMBO J.* **15**:3611-3620.
10. **Stoyan, T., Eck, R., Lechner, J., Hemmerich, P., Kuenkel, W., and S. Diekmann** 1999. Cloning of a centromere binding factor 3D (*CBF3D*) gene from *Candida glabrata*. *Yeast* **15**:793-798.
11. **Stoyan, T., Gloeckner, G., Diekmann, S., and J. A. Carbon.** 2001. Multifunctional centromere binding factor 1 (Cbf1) is essential for chromosome segregation in the human pathogenic yeast *Candida glabrata*. *Mol. Cell Biol.* **21**:4875-4888.
12. **Yannish-Perron, C., Vieira, J., and J. Messing.** 1985. Improved M13 phage cloning vectors and host strains: Nucleotide sequences of the M13 mp18 and pUC19 vectors. *Gene* **33**:103-119.
