# Supplementary material
Source: PubMed Central journal article supplement (PMC522592)
Supplement: eukcell_3_5_1154__2.pdf [file eukcell_3_5_1154__2.pdf]

**Table A2: Oligonucleotides**

| <b>Primer Name</b>                               | <b>Sequence</b>                      | <b>Sites</b> |
|--------------------------------------------------|--------------------------------------|--------------|
| <b>Degenerate Primers for Cloning Cbf3 genes</b> |                                      |              |
| CgCBF3A/1.2                                      | TAYCCIAAYAAYGARGARATG                |              |
| CgCBF3A/2                                        | ATTAAAGTATGATACAAAATC                |              |
| CgCBF3B/1                                        | TTCTGGCAAAGCTATGAA                   |              |
| CgCBF3B/2                                        | CAAATATGCTGCATGTTT                   |              |
| CgCBF3C/1.2                                      | ATIGTIAAYTTRGARGARATG                |              |
| CgCBF3C/2.3                                      | ACRTRRTTIATYTTIATCCA                 |              |
| CgMIF2/1                                         | AAAGATGAGTATAGTATGGAGAA              |              |
| CgMIF2/2.3                                       | TAYTGIATYTTYTCRTTICGCCA              |              |
| CgCSE4/1.2                                       | GAYGTIGAYGARGAYAGRTGG                |              |
| CgCSE4/2.2                                       | AACTGTCCTCTTATTCTCCTA                |              |
| <b>Primers for Gene Deletions</b>                |                                      |              |
| CgA1/1                                           | CGGGGTACCGGGCCAGTCTTCGGG<br>CTT      | <i>KpnI</i>  |
| CgA1/2                                           | TTAACTCGAGAATAGGCCATTTGAT<br>CACACA  | <i>XhoI</i>  |
| CgA2/1                                           | GGGCTCGAGGAATGGTATACGCCA<br>GATCCA   | <i>XhoI</i>  |
| CgA2/2                                           | GTGAGTTCTAGATAGGGCACT                | <i>XbaI</i>  |
| CgB1/1                                           | CGGGGTACCAGTATTATAAATTATC<br>AATAG   | <i>KpnI</i>  |
| CgB1/2                                           | TTAACTCGAGTCTCTTTCGACAATG<br>CCCGCA  | <i>XhoI</i>  |
| CgB2/1                                           | GGGCTCGAGGTAAATCTACCTCCG<br>ATATTT   | <i>XhoI</i>  |
| CgB2/2                                           | AAATCTAGATCTTCAATAGTGGATG<br>ATGTT   | <i>XbaI</i>  |
| CgC1/1                                           | CGGGGTACCTTCTATATACTTTTCG<br>CATATTC | <i>KpnI</i>  |
| CgC1/2                                           | TTAACTCGAGGTAAACCAACTTCCT<br>GACCTC  | <i>XhoI</i>  |
| CgC2/1                                           | GGGCTCGAGTGGATTAAGATTAAT<br>AATGTG   | <i>XhoI</i>  |
| CgC2/2                                           | AAATCTAGATAAATCAGAACCAAC<br>AAATGA   | <i>XbaI</i>  |

|                                                  |                                                  |                             |
|--------------------------------------------------|--------------------------------------------------|-----------------------------|
| <b>Primer for amplifying open reading frames</b> |                                                  |                             |
| GST-MIF2.1                                       | CGGGATCCATGGATTACATGAACCT<br>AGGG                | <i>Bam</i> HI               |
| GST-MIF2.2                                       | CAATGAATTCCTCAATAATGTTTCAG<br>AATGAAAGT          | <i>Eco</i> RI               |
| GST-3D1                                          | CGGGATCCATGGACAAGAAGGGCA<br>AGTACGT              | <i>Bam</i> HI               |
| GST-3D2                                          | CAATGAATTCCTTAGCGGTCCTCCG<br>CCCA                | <i>Eco</i> RI               |
| GST-3C-1                                         | CGGATCCATGGTTGAGGAGCGGTT<br>CAAT                 | <i>Bam</i> HI               |
| GST-3C-2                                         | CAATGAATTCCTTAAATCACAAC<br>TATTACTATGAAC         | <i>Eco</i> RI               |
| Cg3B.1                                           | CGCGAATTCAAGTATGAAAATAAT<br>GAAGTT               | <i>Eco</i> RI               |
| CgB5.2                                           | CGCGGATCCTTAGTCAATGACTCTA<br>TCAAT               | <i>Bam</i> HI               |
| GST-3B-1.2                                       | TCCCCCGGGATGTTCCAGAGGCCAT<br>TGCC                | <i>Sma</i> I                |
| GST-3B-2.1                                       | CCGCTCGAGCTATTAGTCAATGACT<br>CTATCAAT            | <i>Xho</i> I                |
| GST-p110-1                                       | TCCCCCGGGATGATCTCCAAGGAC<br>AATGAG               | <i>Sma</i> I                |
| GST-P110-2                                       | CCGCTCGAGTTAGGTGTGCTGTATC<br>TGATT               | <i>Xho</i> I                |
| CgD2                                             | CCCTCGAGGATCCTTAGCGGTCCTC<br>CGCC                | <i>Xho</i> I/ <i>Bam</i> HI |
| CgD3                                             | GGCTGCAGAATTCAACATTGCACG<br>CTA                  | <i>Pst</i> I/ <i>Eco</i> RI |
| <b>Primers for amplifying promoters</b>          |                                                  |                             |
| Cg1-P.1                                          | TTA TAC CGA GCT CAC AAA CAA<br>ATC ACT CTA CAC G | <i>Sac</i> I                |
| Cg1.P.2                                          | CCA ATT AAG CTT CCT AGA ACG<br>GTT GCT TC        | <i>Hind</i> III             |
| CgA-4                                            | GGG TCC CCC GGG TGG TCT TCT<br>TGC GGT GTA       | <i>Sma</i> I                |
| CgA-5.2                                          | CGG GAT CCT TGG AGA TCA TGA<br>TTG               | <i>Bam</i> HI               |
| 3B-1                                             | TCC CCC GGG CGA TAT AGG CGC<br>CAG               | <i>Sma</i> I                |
| 3B-2                                             | GGA ATT CCA TAT GTA TCT TCC<br>AAT ATA TAT TGA T | <i>Nde</i> I                |
| 3B-3                                             | CGC GGA TCC GCA GAA TAA CTT<br>TCA GCA TCT       | <i>Bam</i> HI               |

|                                                     |                                                           |               |
|-----------------------------------------------------|-----------------------------------------------------------|---------------|
| 3B-4                                                | TTC CAA TGC ATT GGC TGC AGC<br>TTG TAA GAG TTG ATT CTT CT | <i>Pst</i> I  |
| 3C-1                                                | TCC CCC GGG ATG GTG GTG GCA<br>CTA CGT A                  | <i>Sma</i> I  |
| 3C-2                                                | GGA ATT CAT TAA TAC GCG AAA<br>ACT TCT TGG CTT            | <i>Ase</i> I  |
| 3C-3                                                | CGC GGA TCC CTG AAA TAT ATA<br>ATT ACC ATG                | <i>Bam</i> H1 |
| 3C-4                                                | TTC CAA TGC ATT GGC TGC AGT<br>TGG ACT CCT GGA CGA CTC AC | <i>Pst</i> I  |
| <b>Primers for HA-tagging<br/>and ChIP analysis</b> |                                                           |               |
| CgA6.1.2                                            | GAA GAT CTA CCA GAG AAT TCA<br>TTA T                      | <i>Bgl</i> II |
| CgA6.2                                              | CCT TGG CAT ATG GGT GTG CTG<br>TAT CTG ATT CAA            | <i>Nde</i> I  |
| CgB6.1.2                                            | GCT CTA GAG TTG CAA CGT TTA                               | <i>Xba</i> I  |
| CgB6.2                                              | CCT TGG CAT ATG GTC AAT GAC<br>TCT ATC AAT A              | <i>Nde</i> I  |
| CgC6.1                                              | CGG GAT CCA TGA GGA TAG CAA<br>TGA ATC                    | <i>Bam</i> H1 |
| CgC6.2                                              | CCT TGG CAT ATG AAT CAC AAC<br>TAT ATT ACT ATG            | <i>Nde</i> I  |
| CgC6.3                                              | CGG GGT ACC CTG AAA TAT ATA<br>ATT ACC ATG                | <i>Kpn</i> I  |
| CgC6.5                                              | GGT TAC GTA ACC AAC TGC AGG<br>TAC CCA AAA TAT AAA TCA GA | <i>Pst</i> I  |
| HA-F                                                | GGA ATT CCA TAT GGT TGT TTA<br>CCC ATA CGA T              | <i>Nde</i> I  |
| CgHIS3R                                             | GGG GTA CCA TAC CAG ATC ATT<br>TTC AAT AT                 | <i>Kpn</i> I  |
| CgCEN1                                              | TAA CGC AGA GCA CAT CTT TC                                |               |
| CgCEN2                                              | CGC GTA ACT AAT GAT GCA AT                                |               |
| CgACT1                                              | CGG GGT ACC ATG GAT TCT GGT<br>ATG TTC GA                 |               |
| CgACT4                                              | TAT TCA CAC ACG CAG GGA CAG                               |               |
| CgLEU1                                              | CAA GAC AAT TGT AGT TCC ACC                               |               |
| CgLEU2                                              | ACC AAC AGC ACC CAG AAG C                                 |               |
